Periodontal health status in people with Parkinson's disease: a French cohort study.

Samot J<sup>1,4</sup>, Courtin E<sup>2,3</sup>, Guehl D<sup>2,3</sup>, Damon-Perriere N<sup>2,3</sup>, Branchard O<sup>5</sup>, Saint-Jean M<sup>3,7</sup>,  
Chuy V<sup>6,8</sup>, Ella B<sup>1,2,3</sup>, Badet MC<sup>3,4,7</sup>

1 CHU Bordeaux, Department of Oral Surgery, F-33000 Bordeaux, France.

2 Department of Clinical Neurophysiology, Bordeaux University Hospital, Bordeaux, France.

Institute of Neurodegenerative Disorders, Bordeaux

3 University of Bordeaux, France.

4 Univ. Bordeaux, INRAE, Bordeaux INP, Bordeaux Sciences Agro, UMR 1366, OENO, ISVV, F-33140 Villenave d'Omon, France

5 Department of Neurosurgery B, Bordeaux University Hospital, Pellegrin Hospital, 33000, Bordeaux, France

6 Univ. Bordeaux, INSERM, BPH, U1219, F-33000 Bordeaux, France

7 CHU Bordeaux, Department of Dentistry and Oral Health, F-33000 Bordeaux, France.

8 Univ. Bordeaux, CHU Bordeaux, Department of Dentistry and Oral Health, F-33000 Bordeaux, France

Short title: Periodontal health status in Parkinson's disease

Corresponding author: Dr Johan Samot

University of Bordeaux, 146 rue Leo Saignat 33000 Bordeaux, France

Email: [johan.samot@u-bordeaux.fr](mailto:johan.samot@u-bordeaux.fr)

## ABSTRACT

**Introduction:** People with Parkinson's disease (PD) may have difficulty maintaining good oral hygiene due to their motor impairments. This generally leads to a higher prevalence of oral infections, including periodontal disease. To date, no study has addressed this issue in a French population.

**Objective:** The aim of the study, part of the PARKIDENT clinical trial, was to assess the periodontal health of people with PD and to evaluate changes in their periodontal parameters 6 months after receiving hygiene advice.

**Methods:** Data were collected from 40 participants at both baseline and 6-month follow-up. These data included demographic information and an assessment of the participants' PD stage. Oral health assessments included oral hygiene and periodontal status. Microbiological samples were also collected and the data collected during the two visits were compared.

**Results:** Forty people with PD participated in the study. An improvement in oral hygiene habits and a reduction in the plaque index were observed at follow-up. The frequency of patients with significant periodontal pockets (> 6mm) was also reduced (from 20% to 3%). The improvement in these periodontal parameters was associated with a reduction in bacterial load, particularly for *Treponema denticola* (p=0.003).

**Conclusion:** The study suggests that hygiene advice can improve periodontal health in patients with PD, potentially preventing tooth loss and improving their quality of life.

**Clinical Significance:** This study, the first in France on the periodontal health of people with PD, suggests that dental visits and hygiene advice can improve their oral health.

**Keywords:** Parkinson's disease, Periodontitis, oral hygiene, bacteria

## **Introduction**

Parkinson's disease (PD) is a neurodegenerative disease characterized by motor and non-motor symptoms. It affects approximately 1% of people over the age of 60 worldwide (between 6 and 7 million people in total) (de Lau & Breteler, 2006; Dorsey et al., 2018). It is the second most common neurodegenerative disorder in the world after Alzheimer's disease, and is considered the fastest growing neurological disorder worldwide (Ben-Shlomo et al., 2024; Feigin et al., 2017).

The deteriorated motor skills and fine hand movements impairment accompanying this disease complicate daily oral hygiene procedures. Indeed, a number of studies have shown a weakened oral health status and reduced oral hygiene care in patients with PD (Einarsdottir et al., 2009; Hanaoka & Kashihara, 2009; Nakayama, Washio, & Mori, 2004; van Stiphout, Marinus, van Hilten, Lobbezoo, & de Baat, 2018).

The consequence of this poor oral hygiene is that persons with PD have an overall higher prevalence of oral diseases and orofacial dysfunctions. Indeed, previous studies have shown a higher prevalence of caries, gingivitis, periodontitis and tooth loss among this population (Bakke, Larsen, Lautrup, & Karlsborg, 2011; van Stiphout et al., 2018).

Periodontal disease, a complex condition of microbial, inflammatory and genetic etiology, takes a variety of clinical forms. They range from simple, fully reversible gingivitis to complex forms of periodontitis. The latter, which affects the deep structures of the periodontium with destruction of connective tissue and bone, results in loss of attachment, which can lead to tooth mobility and eventual tooth loss. Various studies have shown that PD is especially associated with gingival recession and bleeding linked to the presence of dental plaque and calculus (Cicciu, Risitano, Lo Giudice, & Bramanti, 2012; Muller, Palluch, &

Jackowski, 2011; Schwarz, Heimhilger, & Storch, 2006; Zarpelon, Regina Stahl Melchior, Adalberto Rodrigues-Junior, da Silva Corralo, & Gassen Kellermann, 2019). In addition, the progression of periodontal lesions increases with the severity of Parkinson's disease (Pradeep et al., 2015). The extent of periodontal damage is directly related, at microbiological level, to the total bacterial load, but also to the presence of certain bacterial species such as *Porphyromonas gingivalis*, *Aggregatibacter actinomycetemcomitans* or *Treponema denticola* (Abusleme, Hoare, Hong, & Diaz, 2021; Torrungruang, Jitpakdeebordin, Charatkulangkun, & Gleebua, 2015).

Surprisingly, there are no studies in France on the oral health of people with PD. However, knowledge of the oral health status of French people with PD could enable them to receive appropriate advice and thus improve their oral care, in order to enhance their quality of life.

The objectives of the present study were to describe the periodontal health of people with PD and, following the introduction of hygiene advice, to evaluate the evolution of the participants' periodontal parameters at 6 months.

## **Material and methods**

### Study design and population

This work was part of PARKIDENT, a preliminary prospective interventional clinical study on the oral health of patients with PD (ClinicalTrials.gov Identifier: NCT03827551). The research protocol was reviewed and approved by a French regional ethics committee, the Comité de Protection des Personnes (CPP) Sud-Est III, approval number: Eudract N° 2018-A02773-52.

All participants signed a written informed consent.

Participants were recruited between April 2019 and September 2020 at the Institute of Neurodegenerative Diseases of Bordeaux (France), according to the following inclusion criteria: having PD, being older than 18 years of age, able to give written informed consent, and affiliated with the national health insurance.

Participants were not included if they had another condition that could affect the oral microbiome (antibiotic or antiseptic mouthwash use in the past month), if they were pregnant or wearing subtotal (less than 6 teeth with no molar or incisor) or total dental prosthesis.

Including follow-up visits, data collection has continued until April 2021.

### Data collection

Baseline data included demographic data (gender, age), toothbrushing frequency, and number of dental visit in the past year. The clinical assessment of PD included the Movement Disorder Society-Unified Parkinson's Disease Rating Scale (MDS-UPDRS) for motor PD symptoms (UPDRS 3), the Hoehn & Yahr scale (UPDRS 5) for PD staging, and the duration of the disease since age at diagnosis (Goetz et al., 2007; Hoehn & Yahr, 1967).

Data on oral health were collected by two dentists after a calibration phase on 10 patients not included in this study. These data have been collected before the introduction of hygiene advice and after a period of 6 months (follow-up visit).

Oral hygiene status was assessed using the Simplified Oral Hygiene Index (OHI-S) (Greene & Vermillion, 1964). OHI-S is the sum of the plaque index and the calculus index that quantify the presence of plaque and calculus on 6 reference teeth (four posterior and two anterior). Plaque and calculus are scored on a scale from 0 to 3 and the sum of the values are divided by the number of observed surfaces. Plaque index and calculus index may be interpreted as good (0–0.6), fair (0.7–1.8) and poor (1.9–3.0). OHI-S may be interpreted as good (0–1.2), fair (1.3–3.0) and poor (3.1–6.0).

The periodontal assessment included the Community Periodontal Index for Treatment Needs (CPITN) developed and validated by the World Health Organization (Ainamo et al., 1982). A World Health Organisation (WHO) Basic Periodontal Examination (BPE) probe was used. This is a lightweight metallic probe with a 0.5-mm ball tip, a black band between 3.5 and 5.5 mm, and rings at 8.5 and 11.5 mm from the ball tip. The following categories were used to record periodontal status: healthy periodontium; bleeding during or after periodontal probing; presence of calculus; periodontal pocket 4-5 mm; periodontal pocket >6 mm.

#### Microbiological data

Subgingival dental plaque was obtained by sampling 2 or 3 of the deepest periodontal pockets with sterile paper points, using the PERIO-ANALYSE sampling kit (Institut Clinident SAS, Aix-en-Provence, France). Total bacterial counts were determined by Institut Clinident SAS (Aix-en-Provence, France) using real-time quantitative PCR including specific counts for 9

bacterial species: *Aggregatibacter actinomycetemcomitans*, *Porphyromonas gingivalis*, *Tannerella forsythia*, *Treponema denticola*, *Prevotella intermedia*, *Parvimonas micra*, *Fusobacterium nucleatum*, *Campylobacter rectus*, and *Eikella corrodens*. The analyses sent by Institut Clinident SAS included, in addition to total bacterial quantification, pathogenicity thresholds initially defined by the manufacturer for the use of antibiotic therapy.

#### Statistical analyses

Analyses were performed with R (v 4.2.1), the level of statistical significance was set at  $p < 0.05$  (R Core Team, 2020). Quantitative variables were described as means, standard deviation, medians, first and third quartiles, minimum and maximum. Qualitative variables were described as frequencies and percentages. Paired comparisons between baseline and 6 months examination were conducted using Wilcoxon signed-rank test and McNemar's test.

## **Results**

### Demographic data

Forty patients with PD (65% male; median age 65.3 [min 39.4-max 81.1] years) were included in this study (Table 1). At baseline, the median UPDRS 3 score was 14.5 for a median disease duration of 14.5 years. The median UPDRS5 was 2, indicating a good degree of autonomy.

Due to the COVID crisis, the median follow-up visit was finally 7 months, with a minimum at 3 months and a maximum at 21 months.

Thirty-five patients had a follow-up visit. The 5 patients who had to withdraw from the study did so for various health reasons (broken femur, fatigue, deterioration in general condition, etc.).

### Oral care habits

In total, 37.5% participants reported not having any dental examinations in the previous year. Among those with regular dental appointments, 16% had three or more dental visits in the previous year.

At the follow-up visit, excluding patients lost to follow-up and missing data, all patients had experienced at least one dental visit since baseline (table 2).

Most participants reported to brush their teeth twice a day at baseline, and a non-significant increase in the frequency was observed at the follow-up visit (68% vs. 77%,  $p=0.134$ ).



There was also an improvement in the plaque index between baseline and the follow-up visit, while the calculus index remained stable. OHI-S therefore improved (68% vs. 86% with good oral hygiene,  $p=0.121$ ).

Regarding periodontal status, there was a decrease in the frequency of patients with healthy periodontium, but also a decrease in the frequency of patients with periodontal pockets, with 20% to 3% of patients having periodontal pockets  $>6$  mm at baseline and follow-up visit, respectively (overall,  $p=0.131$  for CPITN status at baseline vs follow-up visit). The positive trend in pocket depth was particularly noticeable for posterior teeth (table 2).

#### Microbiological data

Thirty-three patients had data on the amount of the 9 bacteria assessed at both baseline and follow-up (table 3). The median bacterial load decreased significantly between baseline and follow-up only for *Treponema denticola* ( $p=0.003$ ). The total bacterial load and that of 6 other bacteria also decreased at follow-up compared with baseline. For *Aggregatibacter actinomycetemcomitans*, the bacterial load was zero at both baseline and follow-up, indicating quantities below the PCR detection threshold. *Fusobacterium nucleatum* was the only bacterium for which the count increased by 0.1 points between the baseline and the follow-up visit.

In table 4, considering total flora, more than 70% of the patients had bacterial counts associated with the presence of periodontitis. At follow-up, two additional patients had a bacterial load compatible with the presence of periodontitis. In contrast to baseline, at the follow-up visit, one patient had a bacterial flora quantitatively associated with good

periodontal health, and the frequency of patients with a load compatible with gingivitis had decreased from 27 to 18%.

## Discussion

In the present study, the first to be conducted on the oral health of patients with PD in France, forty participants were included. At baseline, the median Hoehn and Yahr staging scale was 2, indicating a good level of autonomy. We found that participants tended to maintain good hygiene habits at enrollment. Most participants reported brushing their teeth twice a day at baseline, with a slight, non-significant increase at follow-up. Plaque levels improved while calculus remained fairly stable, leading to an overall improvement in OHI-S index. There was a marked reduction in periodontal pockets, particularly for pockets greater than 6 mm. A significant reduction in *Treponema denticola* count was observed, along with reductions in total bacterial load and six other bacteria. At baseline, more than 7 in 10 patients had bacterial counts associated with periodontitis, and none had bacterial profiles consistent with good periodontal health. In contrast, at follow-up, one patient had a bacterial count compatible with healthy periodontium.

Brushing frequency data are similar to those found in other studies conducted in population with PD (Einarsdottir et al., 2009; Lyra et al., 2020; Verhoeff, Lobbezoo, van Leeuwen, Schuller, & Koutris, 2022). According to Einarsdottir et al, these levels are even better than those observed in a control population, although the observed difference was not significant. These results were obtained despite the fact that, at the time of the study, Iceland had no specific dental care policy for people with Parkinson's disease (Einarsdottir et al., 2009).

If we consider only the OHI-S index as a whole, at baseline, oral hygiene can be considered fairly good. However, measurements showed that the plaque index was just acceptable for

half of the participants. It is mainly the calculus index found to be good in almost 9 out of 10 participants that increased the value of this OHI-S. In line with hygiene habits reported as regular but ultimately ineffective, the need for periodontal care was high at enrolment, with nearly 60% of participants presenting with medium (4-5 mm) to deep (> 6mm) periodontal pockets. The presence of these pockets was particularly noticeable in the posterior dental regions. Of the studies assessing pocket depths in people with PD, few are based on the use of CPITN, and those that do, calculate a global score that tends to erase information of interest: the score of each CPITN component not being reported (Barbe et al., 2017; Garcia-de-la-Fuente et al., 2023). Other authors, however, have shown that pocket depth can be increased in people living with PD. Cicciu et al. found a prevalence of pocket depth greater than 5mm of 75.8%, while Hanaoka and Kashihara found 99% of participants with PD with pockets greater than 4mm, versus 44% in their control group (Cicciu et al., 2012; Hanaoka & Kashihara, 2009). In our study, deep periodontal pockets were particularly prevalent in the posterior dental region. This increased pocket depth in the molars is generally perceived as having a poor prognosis for the maintenance of these teeth on the dental arch. Deep periodontal lesions, combined with tooth mobility in this area, have a major impact on masticatory function (Pereira et al., 2012).

Microbiological data also point to a precarious periodontal state, with 5 of the 9 bacteria studied found to have median values above the defined pathogenicity thresholds. Thus, for all participants, the bacterial load was important at inclusion; and none had a bacterial load compatible with a healthy periodontal state. Few data exist on the quality and quantity of the bacterial flora of periodontal disease found in people with PD. However, in 2023, Yay et al.

showed in some twenty patients that the subgingival microbiome associated with periodontitis was altered in people with PD. In deep pockets, *Parvimonas micra*, *Campylobacter rectus*, and *Treponema denticola*, among others, were found more frequently in people with PD than in people with periodontitis in the general population (Yay et al., 2023).

During the inclusion visit, the participants were given personalized hygiene advice based on the clinical records drawn up by the two dentists who had carried out the examinations. Answers to questions about hygiene habits served to refine the advice given. To our knowledge, only one other team has evaluated the effect of an intervention on oral health parameters in patients with PD (Baram, Karlsborg, & Bakke, 2020; Baram, Karlsborg, Ozhayat, & Bakke, 2021). As with the results of this team's work, the data collected during the follow-up visit showed the overall positive effect of the hygiene advice, with an improvement in many of the parameters observed.

As far as can be determined, with 8 values missing, including those of the 5 participants who were not present at the follow-up visit, the intervention had no effect on dental visits. Few changes were also observed in brushing frequency, but this was already rather encouraging, with over two-thirds of participants reporting brushing 2 or more times a day at baseline. There are few data on the effect of personalized advice on brushing frequency and, to our knowledge, none in a population with PD. In contrast to the results of our study, López-Jornet et al. found an increase in brushing frequency, but this assessment was made 2 months after motivation and not 6 months as in our study (Lopez-Jornet, Fabio, Consuelo, & Paz, 2014).

The plaque index improved at the follow-up visit. These data are quite consistent with the results of Baram et al. who had a significant improvement in plaque index at 2 months after intervention in two groups of about fifteen patients (Baram et al., 2020). The assessment of the presence of calculus is less easy to analyze. This is due to the fact that in this study the presence of calculus is reported by two different indices: the calculus index integrated with the OHI-S and the CPITN. Based on the OHI-S alone, the number of participants with a good calculus index decreases, as does the number with a fair calculus index. However, the decrease is slight and can be partly explained by the number of participants lost to follow-up. The presence of calculus, as assessed by the CPITN, shows a higher prevalence of calculus in patients who had a follow-up visit, but CPITN analysis also demonstrates a marked reduction in periodontal pockets exceeding 4mm in depth. This pattern is particularly evident when the CPITN is analyzed specifically in relation to the posterior teeth. This positive trend indicates a possible regression in the severity of periodontal damage, despite the presence of significant levels of calculus. The significant and persistent presence of calculus despite improved hygiene can be explained by the absence of scaling between enrolment and follow-up. In fact, scaling is a professional procedure that requires a dentist, unlike plaque removal, which can be done at home. What may be more surprising is the improvement in pocket depth despite the persistence of calculus. Other authors have shown improvement in gingival health parameters despite the presence of significant amounts of calculus when the plaque index was reduced (Gaare, Rolla, Aryadi, & van der Ouderaa, 1990). This demonstrates the critical importance of controlling the microbial factor in the evolution of periodontal disease.

In line with reduced severity of the periodontal lesions, there was an overall drop in total bacterial load. Despite the reduction in pocket depth and median bacterial load, many patients remain with a high bacterial load, as only one patient had a total bacterial load compatible with good periodontal health at the follow-up visit. These results are consistent with those of He et al, who showed that pocket depth is poorly correlated with bacterial load. Rather, it correlates with the presence of greater numbers of specific pathogens such as *Porphyromonas gingivalis*, *Tannerella forsythia*, and *Treponema denticola* (He et al., 2020). In our study, the median bacterial load of the above bacteria decreased. For *T. denticola*, the decrease was significant.

Despite the small sample size and the interference with follow-up due to the COVID crisis, our study provides important information on the effectiveness of a therapeutic education intervention in improving periodontal health parameters in people with Parkinson's disease. In a sample of patients with relatively good motor scores, a reduction in lesion severity was observed, as well as a downward trend in certain periodontal pathogenic bacteria. Addressing the bacterial origin of inflammation in periodontitis is essential, as many authors have suggested that periodontal lesions could influence systemic inflammation, with a particular impact on neuroinflammation (Adams et al., 2019; Hajishengallis, 2015; Li, Kiprowska, Kansara, Kansara, & Li, 2022).

The present study, the first in France to provide microbiological data on the periodontal health of people with PD, is also interesting as a regional study. Indeed, some authors have reported differences in the presence of certain bacterial species isolated from very severe periodontal

lesions depending on the geographic region in which the studies were performed (Lafaurie et al., 2022). Further studies with more microbiological data are therefore needed.

Finally, this work, together with recent studies on the oral health of people with PD, helps to establish appropriate recommendations for the multidisciplinary management of this population. Martimbianco et al. recently provided a summary of some recommendations that should be followed to improve the quality of life of people with Parkinson's disease (Martimbianco et al., 2021).



## **Conclusion:**

We first report a short-term effect of hygiene advices on periodontal status in patients suffering from moderate forms of Parkinson's disease associated with a reduction of the oral microbiota. This suggest that early delivery of hygiene advices in this population could improve the quality of periodontium and prevent tooth loss which can affect their quality of life. To this end, a multidisciplinary management strategy would be of great interest for monitoring and improving the quality of life of patients with Parkinson's disease.

## **Acknowledgments**

We would like to express our sincere gratitude to Drs. Magnim Bassou and Cécilia Dapremont. As dental students at the time of data collection, they provided invaluable assistance in patient follow-up.

Martine Saint-Marc, biomedical research technician, is gratefully acknowledged for technical assistance in the laboratory.

Our last words are dedicated to the memory of the recently deceased Dr. Marie-Cécile Badet, who was one of the investigators of the team and contributed to the genesis of this project.

**Funding:** This work was supported by France Parkinson.

## REFERENCES

- Abusleme, L., Hoare, A., Hong, B. Y., & Diaz, P. I. (2021). Microbial signatures of health, gingivitis, and periodontitis. *Periodontol 2000*, *86*(1), 57-78. doi:10.1111/prd.12362
- Adams, B., Nunes, J. M., Page, M. J., Roberts, T., Carr, J., Nell, T. A., . . . Pretorius, E. (2019). Parkinson's Disease: A Systemic Inflammatory Disease Accompanied by Bacterial Inflammagens. *Front Aging Neurosci*, *11*, 210. doi:10.3389/fnagi.2019.00210
- Ainamo, J., Barmes, D., Beagrie, G., Cutress, T., Martin, J., & Sardo-Infirri, J. (1982). Development of the World Health Organization (WHO) community periodontal index of treatment needs (CPTN). *Int Dent J*, *32*(3), 281-291.
- Bakke, M., Larsen, S. L., Lautrup, C., & Karlsborg, M. (2011). Orofacial function and oral health in patients with Parkinson's disease. *Eur J Oral Sci*, *119*(1), 27-32. doi:10.1111/j.1600-0722.2010.00802.x
- Baram, S., Karlsborg, M., & Bakke, M. (2020). Improvement of oral function and hygiene in Parkinson's disease: A randomised controlled clinical trial. *J Oral Rehabil*, *47*(3), 370-376. doi:10.1111/joor.12924
- Baram, S., Karlsborg, M., Ozhayat, E. B., & Bakke, M. (2021). Effect of orofacial physiotherapeutic and hygiene interventions on oral health-related quality of life in patients with Parkinson's disease: A randomised controlled trial. *J Oral Rehabil*, *48*(9), 1035-1043. doi:10.1111/joor.13214

- Barbe, A. G., Heinzler, A., Derman, S., Hellmich, M., Timmermann, L., & Noack, M. J. (2017). Hyposalivation and xerostomia among Parkinson's disease patients and its impact on quality of life. *Oral Dis*, 23(4), 464-470. doi:10.1111/odi.12622
- Ben-Shlomo, Y., Darweesh, S., Llibre-Guerra, J., Marras, C., San Luciano, M., & Tanner, C. (2024). The epidemiology of Parkinson's disease. *Lancet*, 403(10423), 283-292. doi:10.1016/S0140-6736(23)01419-8
- Cicciu, M., Risitano, G., Lo Giudice, G., & Bramanti, E. (2012). Periodontal health and caries prevalence evaluation in patients affected by Parkinson's disease. *Parkinsons Dis*, 2012, 541908. doi:10.1155/2012/541908
- de Lau, L. M., & Breteler, M. M. (2006). Epidemiology of Parkinson's disease. *Lancet Neurol*, 5(6), 525-535. doi:10.1016/S1474-4422(06)70471-9
- Dorsey, E. R., Elbaz, A., Nichols, E., Abbasi, N., Abd-Allah, F., Abdelalim, A., . . . Murray, C. J. L. (2018). Global, regional, and national burden of Parkinson's disease, 1990-2016: a systematic analysis for the Global Burden of Disease Study 2016. *The Lancet Neurology*, 17(11), 939-953. doi:10.1016/S1474-4422(18)30295-3
- Einarsdottir, E. R., Gunnsteinsdottir, H., Hallsdottir, M. H., Sveinsson, S., Jonsdottir, S. R., Olafsson, V. G., . . . Holbrook, W. P. (2009). Dental health of patients with Parkinson's disease in Iceland. *Spec Care Dentist*, 29(3), 123-127. doi:10.1111/j.1754-4505.2009.00075.x
- Feigin, V. L., Abajobir, A. A., Abate, K. H., Abd-Allah, F., Abdulle, A. M., Abera, S. F., . . . Vos, T. (2017). Global, regional, and national burden of neurological disorders during 1990-2015: a systematic analysis for the Global Burden of Disease Study 2015. *Lancet Neurol*, 16(11), 877-897. doi:10.1016/s1474-4422(17)30299-5

- Gaare, D., Rolla, G., Aryadi, F. J., & van der Ouderaa, F. (1990). Improvement of gingival health by toothbrushing in individuals with large amounts of calculus. *J Clin Periodontol*, *17*(1), 38-41. doi:10.1111/j.1600-051x.1990.tb01045.x
- Garcia-de-la-Fuente, A. M., Fernandez-Jimenez, A., Lafuente-Ibanez-de-Mendoza, I., Lartitegui-Sebastian, M. J., Marichalar-Mendia, X., & Aguirre-Urizar, J. M. (2023). Periodontal health in a population with Parkinson's disease in Spain: a cross-sectional study. *Med Oral Patol Oral Cir Bucal*, *28*(1), e32-e40. doi:10.4317/medoral.25540
- Goetz, C. G., Fahn, S., Martinez-Martin, P., Poewe, W., Sampaio, C., Stebbins, G. T., . . . LaPelle, N. (2007). Movement Disorder Society-sponsored revision of the Unified Parkinson's Disease Rating Scale (MDS-UPDRS): Process, format, and clinimetric testing plan. *Mov Disord*, *22*(1), 41-47. doi:10.1002/mds.21198
- Greene, J. C., & Vermillion, J. R. (1964). The Simplified Oral Hygiene Index. *J Am Dent Assoc*, *68*, 7-13. doi:10.14219/jada.archive.1964.0034
- Hajishengallis, G. (2015). Periodontitis: from microbial immune subversion to systemic inflammation. *Nat Rev Immunol*, *15*(1), 30-44. doi:10.1038/nri3785
- Hanaoka, A., & Kashihara, K. (2009). Increased frequencies of caries, periodontal disease and tooth loss in patients with Parkinson's disease. *J Clin Neurosci*, *16*(10), 1279-1282. doi:10.1016/j.jocn.2008.12.027
- He, J., Da, L., Pan, Y., Tan, X., Li, Z., Luo, F., . . . Gu, D. (2020). Association between quantitative analyses of periodontal pathogens and the depth of periodontal pockets. *Biotechnology & Biotechnological Equipment*, *34*(1), 515-521. doi:10.1080/13102818.2020.1764387

- Hoehn, M. M., & Yahr, M. D. (1967). Parkinsonism: onset, progression and mortality. *Neurology*, *17*(5), 427-442. doi:10.1212/wnl.17.5.427
- Lafaurie, G. I., Neuta, Y., Rios, R., Pacheco-Montealegre, M., Pianeta, R., Castillo, D. M., . . . Iniesta, M. (2022). Differences in the subgingival microbiome according to stage of periodontitis: A comparison of two geographic regions. *PLoS One*, *17*(8), e0273523. doi:10.1371/journal.pone.0273523
- Li, X., Kiprowska, M., Kansara, T., Kansara, P., & Li, P. (2022). Neuroinflammation: A Distal Consequence of Periodontitis. *J Dent Res*, *101*(12), 1441-1449. doi:10.1177/00220345221102084
- Lopez-Jornet, P., Fabio, C. A., Consuelo, R. A., & Paz, A. M. (2014). Effectiveness of a motivational-behavioural skills protocol for oral hygiene among patients with hyposalivation. *Gerodontology*, *31*(4), 288-295. doi:10.1111/ger.12037
- Lyra, P., Machado, V., Proenca, L., Domingos, J., Godinho, C., Mendes, J. J., & Botelho, J. (2020). Parkinson's Disease, Periodontitis and Patient-Related Outcomes: A Cross-Sectional Study. *Medicina (Kaunas)*, *56*(8). doi:10.3390/medicina56080383
- Martimbianco, A. L. C., Prosdocimi, F. C., Anauate-Netto, C., Dos Santos, E. M., Mendes, G. D., & Fragoso, Y. D. (2021). Evidence-Based Recommendations for the Oral Health of Patients with Parkinson's Disease. *Neurol Ther*, *10*(1), 391-400. doi:10.1007/s40120-021-00237-4
- Muller, T., Palluch, R., & Jackowski, J. (2011). Caries and periodontal disease in patients with Parkinson's disease. *Spec Care Dentist*, *31*(5), 178-181. doi:10.1111/j.1754-4505.2011.00205.x

- Nakayama, Y., Washio, M., & Mori, M. (2004). Oral health conditions in patients with Parkinson's disease. *J Epidemiol*, *14*(5), 143-150. doi:10.2188/jea.14.143
- Pereira, L. J., Gazolla, C. M., Magalhaes, I. B., Dominguet, M. H., Vilela, G. R., Castelo, P. M., . . . Van Der Bilt, A. (2012). Influence of periodontal treatment on objective measurement of masticatory performance. *J Oral Sci*, *54*(2), 151-157. doi:10.2334/josnusd.54.151
- Pradeep, A. R., Singh, S. P., Martande, S. S., Raju, A. P., Rustagi, T., Suke, D. K., & Naik, S. B. (2015). Clinical evaluation of the periodontal health condition and oral health awareness in Parkinson's disease patients. *Gerodontology*, *32*(2), 100-106. doi:10.1111/ger.12055
- R Core Team. (2020). R: A language and environment for statistical computing (Version 3.5.3). Vienna, Austria: R Foundation for Statistical Computing. Retrieved from <http://www.R-project.org/>.
- Schwarz, J., Heimhilger, E., & Storch, A. (2006). Increased periodontal pathology in Parkinson's disease. *J Neurol*, *253*(5), 608-611. doi:10.1007/s00415-006-0068-4
- Torrunguang, K., Jitpakdeebordin, S., Charatkulangkun, O., & Gleebua, Y. (2015). Porphyromonas gingivalis, Aggregatibacter actinomycetemcomitans, and Treponema denticola / Prevotella intermedia Co-Infection Are Associated with Severe Periodontitis in a Thai Population. *PLoS One*, *10*(8), e0136646. doi:10.1371/journal.pone.0136646
- van Stiphout, M. A. E., Marinus, J., van Hilten, J. J., Lobbezoo, F., & de Baat, C. (2018). Oral Health of Parkinson's Disease Patients: A Case-Control Study. *Parkinsons Dis*, *2018*, 9315285. doi:10.1155/2018/9315285

Verhoeff, M. C., Lobbezoo, F., van Leeuwen, A. M., Schuller, A. A., & Koutris, M. (2022).

Oral health-related quality of life in patients with Parkinson's disease. *J Oral Rehabil*, 49(4), 398-406. doi:10.1111/joor.13304

Yay, E., Yilmaz, M., Toygar, H., Balci, N., Alvarez Rivas, C., Bolluk Kilic, B., . . . Kantarci,

A. (2023). Parkinson's disease alters the composition of subgingival microbiome. *J Oral Microbiol*, 15(1), 2250650. doi:10.1080/20002297.2023.2250650

Zarpelon, C., Regina Stahl Melchiors, N., Adalberto Rodrigues-Junior, S., da Silva Corralo,

V., & Gassen Kellermann, M. (2019). Oral health condition of elderly people with Parkinson disease. *RFO UPF*, 211-219.



**Table 1:** Participant characteristics at baseline

| <b>Characteristics at baseline</b>             | <b>TOTAL (N=40)</b> |
|------------------------------------------------|---------------------|
| <b>Female</b>                                  | 14 (35)             |
| <b>Age (years)</b>                             | 65.3 [57.9-72.8]    |
| <b>UPDRS3 Score, 2 m.d.</b>                    | 14.5 [10.0-23.5]    |
| <b>UPDRS5 Score, 2 m.d.</b>                    | 2.0 [2.0-3.0]       |
| <b>Duration of the disease (years), 2 m.d.</b> | 14.5 [9.0-20.0]     |

Values in N (%) for the qualitative variable and in median [1st quartile – 3rd quartile] for quantitative variables.  
m.d.: missing data; UPDRS: Unified Parkinson’s Disease Rating Scale.

**Table 2:** Participants oral care habits

| Characteristics                                                                         | Baseline<br>(N=40) | Follow-up visit<br>(N=35) | p*    |
|-----------------------------------------------------------------------------------------|--------------------|---------------------------|-------|
| <b>Dental visit in the past year</b>                                                    | 25 (62)            |                           |       |
| <b>Number of visits to the dentist in the past year</b> (for those with $\geq 1$ visit) | 1.0 [1.0-2.0]      |                           | n.a.  |
| 1                                                                                       | 16 (40)            |                           |       |
| 2                                                                                       | 5 (13)             |                           |       |
| $\geq 3$                                                                                | 4 (10)             |                           |       |
| <b>Number of visits to the dentist since baseline, 3 m.d.</b>                           |                    |                           | n.a.  |
| None                                                                                    |                    | 10 (29)                   |       |
| 1                                                                                       |                    | 19 (54)                   |       |
| 2                                                                                       |                    | 3 (9)                     |       |
| <b>Toothbrushing frequency, 1 m.d.</b>                                                  |                    |                           | 0.134 |
| <2 times/day                                                                            | 12 (30)            | 7 (20)                    |       |
| $\geq 2$ times/day                                                                      | 27 (68)            | 27 (77)                   |       |
| <b>Plaque index, 1 m.d. at follow-up</b>                                                |                    |                           | 0.239 |
| Good                                                                                    | 20 (50)            | 25 (71)                   |       |
| Fair                                                                                    | 20 (50)            | 9 (26)                    |       |
| <b>Calculus index, 1 m.d. at follow-up</b>                                              |                    |                           | 0.248 |
| Good                                                                                    | 35 (88)            | 31 (89)                   |       |
| Fair                                                                                    | 5 (13)             | 3 (9)                     |       |
| <b>OHI-S, 1 m.d. at follow-up</b>                                                       |                    |                           | 0.121 |
| Good                                                                                    | 27 (68)            | 30 (86)                   |       |
| Fair                                                                                    | 13 (33)            | 4 (11)                    |       |
| <b>CPITN status</b>                                                                     |                    |                           | 0.131 |
| Healthy periodontium                                                                    | 10 (25)            | 8 (23)                    |       |
| Bleeding during or after periodontal probing                                            | 3 (8)              | 6 (17)                    |       |
| Presence of calculus                                                                    | 4 (10)             | 10 (29)                   |       |
| Periodontal pocket 4-5 mm                                                               | 15 (38)            | 10 (29)                   |       |
| Periodontal pocket >6 mm                                                                | 8 (20)             | 1 (3)                     |       |
| <b>CPITN status for posterior teeth</b>                                                 |                    |                           | 0.091 |
| Healthy periodontium                                                                    | 11 (28)            | 12 (34)                   |       |
| Bleeding during or after periodontal probing                                            | 7 (18)             | 10 (29)                   |       |
| Presence of calculus                                                                    | 2 (5)              | 3 (9)                     |       |
| Periodontal pocket 4-5 mm                                                               | 13 (33)            | 9 (26)                    |       |
| Periodontal pocket >6 mm                                                                | 7 (18)             | 1 (3)                     |       |

Values in N (%) for qualitative variables and in median [1st quartile – 3rd quartile] for the quantitative variable.

m.d.: missing data; CPITN: Community Periodontal Index for Treatment Needs; n.a.: not applicable; OHI-S: Simplified Oral Hygiene Index.

\* McNemar's Chi-squared test with continuity correction.

**Table 3:** Description of periodontal bacteria in patients at baseline and at the follow-up visit (ln)

| Periodontal bacteria                            | Pathogenicity threshold                                                  | Baseline<br>(N=33) | Follow-up visit<br>(N=33) | p            |
|-------------------------------------------------|--------------------------------------------------------------------------|--------------------|---------------------------|--------------|
| Total Flora                                     | Healthy periodontium < 16.1<br>Gingivitis < 18.4<br>Periodontitis > 18.4 | 21.6 [20.7-22.6]   | 21.4 [20.8-22.5]          | 0.406        |
| <i>Aggregatibacter actinomycetemcomitans</i>    | 6.9                                                                      | 0.0 [0.0-0.0]      | 0.0 [0.0-0.0]             | 0.789        |
| <i>Porphyromonas gingivalis</i>                 | 11.5                                                                     | 10.9 [0.0-14.5]    | 10.4 [0.0-12.0]           | 0.338        |
| <i>Tannerella forsythia</i>                     | 11.5                                                                     | 12.8 [11.4-14.0]   | 11.8 [10.0-14.5]          | 0.660        |
| <i>Treponema denticola</i>                      | 11.5                                                                     | 13.4 [10.9-15.8]   | 11.1 [8.6-13.3]           | <b>0.003</b> |
| <i>Prevotella intermedia</i>                    | 11.5                                                                     | 16.6 [13.9-17.5]   | 16.5 [13.9-17.4]          | 0.427        |
| <i>Parvimonas micra</i>                         | 13.8                                                                     | 14.1 [12.5-15.2]   | 13.5 [11.6-15.4]          | 0.235        |
| <i>Fusobacterium nucleatum</i>                  | 16.1                                                                     | 15.8 [15.3-17.0]   | 15.9 [13.8-17.0]          | 0.321        |
| <i>Campylobacter rectus</i>                     | 13.8                                                                     | 14.6 [13.5-15.5]   | 13.2 [11.4-15.0]          | 0.065        |
| <i>Eikenella corrodens</i>                      | 16.1                                                                     | 13.1 [11.5-14.3]   | 11.4 [8.2-14.0]           | 0.173        |
| Values in median [1st quartile – 3rd quartile]. |                                                                          |                    |                           |              |

**Table 4:** Description of periodontal bacteria at baseline and at the follow-up visit in relation to pathogenicity thresholds

| Periodontal bacteria                          | Baseline<br>(N=33) | Follow-up visit<br>(N=33) | p     |
|-----------------------------------------------|--------------------|---------------------------|-------|
| <b>Total flora</b>                            |                    |                           | 0.456 |
| Healthy periodontium                          | 0                  | 1 (3)                     |       |
| Gingivitis                                    | 9 (27)             | 6 (18)                    |       |
| Periodontitis                                 | 24 (73)            | 26 (79)                   |       |
| <i>A. actinomycetemcomitans</i> $\geq 1e+0.3$ | 3 (9)              | 3 (9)                     | 1     |
| <i>Porphyromonas gingivalis</i> $\geq 1e+0.5$ | 15 (46)            | 12 (36)                   | 0.546 |
| <i>Tannerella forsythia</i> $\geq 1e+0.5$     | 24 (73)            | 18 (55)                   | 0.211 |
| <i>Treponema denticola</i> $\geq 1e+0.5$      | 23 (70)            | 15 (46)                   | 0.080 |
| <i>Prevotella intermedia</i> $\geq 1e+0.5$    | 31 (94)            | 29 (88)                   | 0.480 |
| <i>Parvimonas micra</i> $\geq 1e+0.6$         | 18 (55)            | 15 (46)                   | 0.803 |
| <i>Fusobacterium nucleatum</i> $\geq 1e+0.7$  | 14 (42)            | 16 (49)                   | 0.814 |
| <i>Campylobacter rectus</i> $\geq 1e+0.6$     | 22 (67)            | 15 (46)                   | 0.121 |
| <i>Eikenella corrodens</i> $\geq 1e+0.7$      | 2 (6)              | 2 (6)                     | 1     |
| Values in N (%).                              |                    |                           |       |
